# Supplementary material for: Unveiling the origin of the efficient photocatalytic degradation of nitazoxanide over bismuth (oxy)iodide crystalline phases
Source: Royal Society of Chemistry journal article supplement (doi:10.1039/d3en00548h), 2023-12-05
Supplement: d3en00548h1.pdf [file d3en00548h1.pdf]

## Electronic Supplementary Information

### Unveiling the Origin of Efficient Photocatalytic Degradation of Nitazoxanide Over Bismuth (Oxy)Iodide Crystalline Phases

Mirabbos Hojamberdiev<sup>a,\*</sup>, Ronald Vargas<sup>b,c</sup>, Lorean Madriz<sup>b,c</sup>, Kunio Yubuta<sup>d</sup>, Zukhra C. Kadirova<sup>e,f</sup>,  
Ulugbek Shaislamov<sup>g</sup>, Lokesh Koodlur Sannegowda<sup>h</sup>, Katarzyna Jędruchiewicz<sup>i</sup>, Rafał Typek<sup>j</sup>,  
Katsuya Teshima<sup>k</sup> and Bożena Czech<sup>i,\*</sup>

<sup>a</sup>*Institut für Chemie, Technische Universität Berlin, Straße des 17. Juni 135, 10623 Berlin, Germany*

<sup>b</sup>*Instituto Tecnológico de Chascomús (INTECH), Consejo Nacional de Investigaciones Científicas y Técnicas (CONICET), Universidad Nacional de San Martín (UNSAM), Avenida Intendente Marino, Km 8,2, (B7130IWA), Chascomús, Provincia de Buenos Aires, Argentina*

<sup>c</sup>*Escuela de Bio y Nanotecnologías, Universidad Nacional de San Martín (UNSAM). Avenida Intendente Marino, Km 8,2, (B7130IWA), Chascomús, Provincia de Buenos Aires, Argentina*

<sup>d</sup>*Department of Applied Quantum Physics and Nuclear Engineering, Kyushu University, Fukuoka 819-0395, Japan*

<sup>e</sup>*Department of General and Inorganic Chemistry, Faculty of Chemistry, National University of Uzbekistan, University Street 4, 100174 Tashkent, Uzbekistan*

<sup>f</sup>*Uzbekistan-Japan Innovation Center of Youth, University Street 2B, 100095 Tashkent, Uzbekistan*

<sup>g</sup>*Center for Development of Nanotechnology at the National University of Uzbekistan, Tashkent, Uzbekistan, University str. 4, 100174 Tashkent, Uzbekistan*

<sup>h</sup>*Department of Studies in Chemistry, Vijayanagara Sri Krishnadevaraya University, Cantonment, Vinayakanagara, Ballari, 583105, India*

<sup>i</sup>*Department of Radiochemistry and Environmental Chemistry, Institute of Chemical Sciences, Faculty of Chemistry, Maria Curie-Skłodowska University in Lublin, 3 Maria Curie-Skłodowska Sq., 20-031 Lublin, Poland*

<sup>j</sup>*Department of Chromatography, Institute of Chemical Sciences, Faculty of Chemistry, Maria Curie-Skłodowska University in Lublin, 3 Maria Curie-Skłodowska Sq., 20-031 Lublin, Poland*

<sup>k</sup>*Department of Materials Chemistry, Shinshu University, 4-17-1 Wakasato, Nagano 380-8553, Japan*

\*Corresponding authors: E-mail addresses: [bozena.czech@mail.umcs.pl](mailto:bozena.czech@mail.umcs.pl) (B. Czech) and [hmirabbos@gmail.com](mailto:hmirabbos@gmail.com) (M. Hojamberdiev)

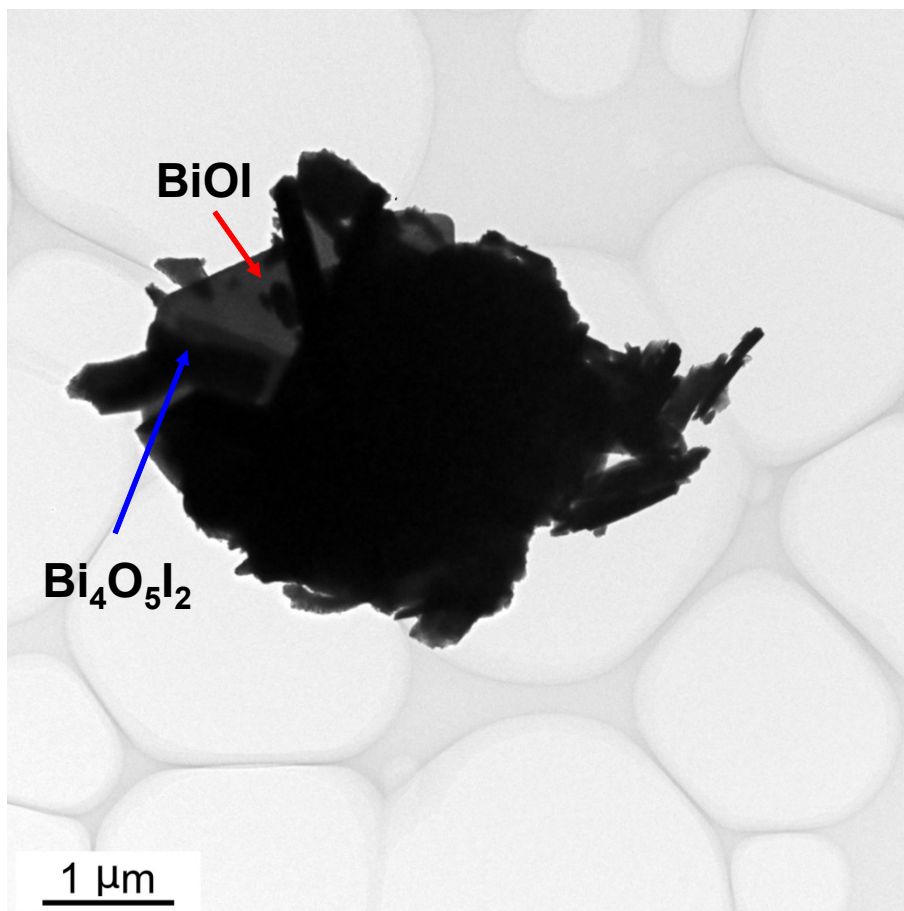

**Figure S1.** TEM image of BiOI/Bi<sub>4</sub>O<sub>5</sub>I<sub>2</sub> heterostructures.

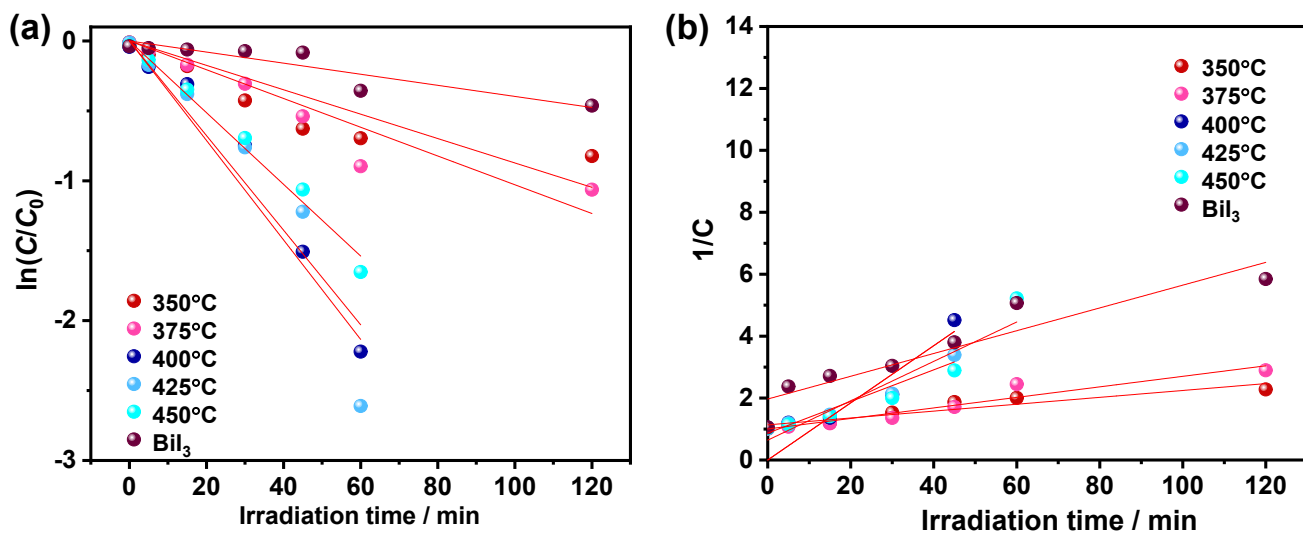

**Figure S2.** Comparison of pseudo-first-order (a) and pseudo-second-order (b) kinetic models of the photocatalytic removal of nitazoxanide by the synthesized photocatalysts.

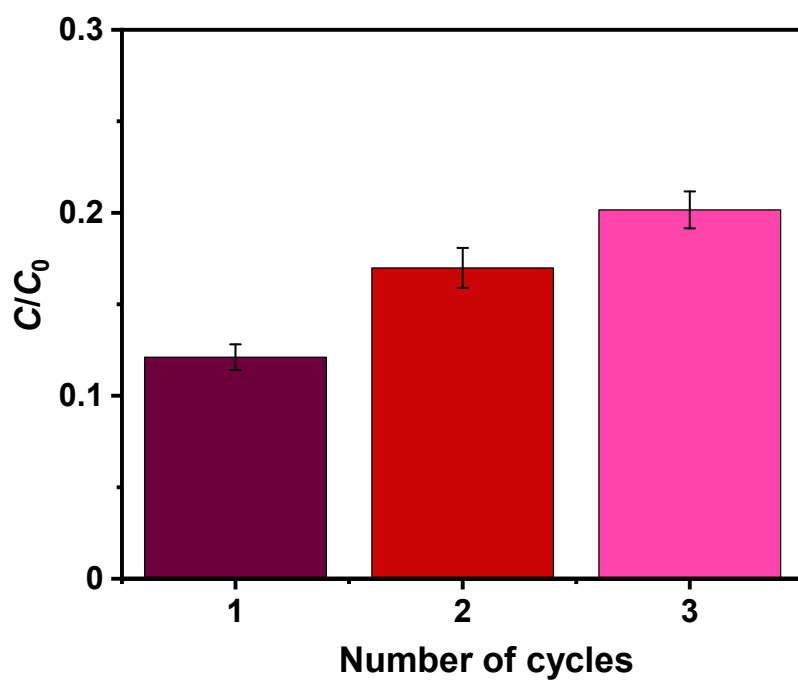

**Figure S3.** Reusability test of the sample thermally treated at 375°C for the photocatalytic degradation of nitazoxanide for three consecutive cycles.

**Table S1.** Comparison of efficiencies of bismuth oxyiodides for the removal of carious pollutants.

| Photocatalyst                                                                   | Pollutant                                           | Conditions                      | Efficiency                                                                | Ref.                                                           |
|---------------------------------------------------------------------------------|-----------------------------------------------------|---------------------------------|---------------------------------------------------------------------------|----------------------------------------------------------------|
| BiOI/Bi <sub>4</sub> O <sub>5</sub> I <sub>2</sub> (375)                        | Nitazoxanide                                        | Under visible light irradiation | 100%, 60 min                                                              | <i>This study</i>                                              |
| BiOI/Bi <sub>4</sub> O <sub>5</sub> I <sub>2</sub> (400)                        | Methylene blue                                      | Under visible light irradiation | 100%, 120 min                                                             | <i>Inorg. Chem. Commun.</i> , 2018, <b>93</b> , 65–68.         |
| ZnFe <sub>2</sub> O <sub>4</sub> /BiOI/AgI                                      | Rhodamine B                                         | Under visible light irradiation | 100%, 90 min photocatalysis<br>100%, 35 min photo-Fenton                  | <i>Mater. Res. Bull.</i> , 2024, <b>169</b> , 112508.          |
| Ag-BiOI                                                                         | Diclofenac sodium                                   | Photoelectrocatalysis           | 92%, 240 min                                                              | <i>Sci. Rep.</i> , 2022, <b>12</b> , 4214                      |
| BiOI/UiO-66 p-n heterojunction                                                  | Sulfadiazine                                        | Under visible light irradiation | 100%, 90 min                                                              | <i>Chem. Eng. J.</i> , 2023, <b>451</b> , 138624.              |
| BiOI                                                                            | Sulfamethoxazole                                    | Under visible light irradiation | <80%, 60 min photocatalysis<br>100%, 30 min in combined with chlorination | <i>Chem. Eng. J.</i> , 2023, <b>452</b> , 139103.              |
| BiOBr <sub>x</sub> I <sub>(1-x)</sub>                                           | Rhodamine B, tetracycline hydrochloride             | Under visible light irradiation | 100% RhB, 12 min<br>90% TCH, 12 min                                       | <i>Mater. Res. Bull.</i> , 2024, <b>169</b> , 112506.          |
| BiOI/BiOBr                                                                      | Tetracycline                                        | Under visible light irradiation | 90%, 90 min                                                               | <i>Appl. Catal. B</i> , 2024, <b>304</b> , 123226.             |
| BiOI/NH <sub>2</sub> -MIL125(Ti)                                                | Oxytetracycline                                     | Photocatalytic-ozonation        | 100%, 100 min                                                             | <i>Sci. Rep.</i> , 2023, <b>13</b> , 11113                     |
| Bi <sub>3</sub> O <sub>4</sub> Cl/Bi <sub>4</sub> O <sub>5</sub> I <sub>2</sub> | Tetracycline, Rhodamine B                           | Under visible light irradiation | 70.6% TC, 60 min<br>97.4% RhB, 60 min                                     | <i>J. Colloid Interface Sci.</i> , 2023, <b>652</b> , 798–812. |
| Ag/Bi <sub>4</sub> O <sub>5</sub> I <sub>2</sub> /reduced graphene oxide        | Tetracycline hydrochloride, ofloxacin, levofloxacin | Under visible light irradiation | 90.2% TCH<br>60.9% ofloxacin<br>38.5% for levofloxacin after 180 min      | <i>Mater. Today Sustain.</i> , 2023, <b>24</b> , 100478.       |

**Table S2.** Adsorption energy of nitazoxanide and water molecules.

| Crystal plane                                                                  | $E_{\text{ads}}$<br>(kcal·mol <sup>-1</sup> ) | $dE_{\text{ads}}/dN_i$<br>( <i>nitazoxanide</i> ) | $dE_{\text{ads}}/dN_i$<br>( <i>water</i> ) |
|--------------------------------------------------------------------------------|-----------------------------------------------|---------------------------------------------------|--------------------------------------------|
| BiOI (1 0 2)                                                                   | -138.92                                       | -64.51                                            | -6.69                                      |
| BiOI (1 1 0)                                                                   | -124.54                                       | -69.28                                            | -5.18                                      |
| BiOI ( $\bar{1} \bar{1} 0$ )                                                   | -122.20                                       | -68.43                                            | -4.85                                      |
| Bi <sub>4</sub> O <sub>5</sub> I <sub>2</sub> ( $\bar{1} 0 1$ )                | -46.81                                        | -25.17                                            | -0.03                                      |
| BiOI (1 1 0) + Bi <sub>4</sub> O <sub>5</sub> I <sub>2</sub> ( $\bar{1} 0 1$ ) | -121.52                                       | -66.71                                            | -5.07                                      |
| BiOI (1 0 2) + Bi <sub>4</sub> O <sub>5</sub> I <sub>2</sub> ( $\bar{1} 0 1$ ) | -147.10                                       | -65.87                                            | -7.59                                      |
| Bi <sub>5</sub> O <sub>7</sub> I (2 0 0)                                       | -43.61                                        | -24.76                                            | -1.63                                      |
| BiI <sub>3</sub> ( $2 \bar{1} 3$ )                                             | -42.94                                        | -22.63                                            | -0.07                                      |
